# Supplementary material
Source: Springer Nature journal article supplement (https://www.springermedizin.de/resource/supplementary/12902_2013_259_MOESM1_ESM.pdf/9515896)
Supplement: MOESM1 [file 9515896]

30 adults with pre-diabetes

**Recruitment**

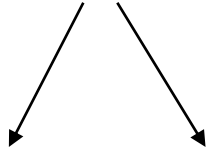

**Randomisation**

Data collection: Age, BMI, waist circumference, medication, physical activity, passive smoking, diet history, serum: carboxymethyllysine (CML), methylglyoxal (MG), fasting glucose, fasting insulin, HOMA-IR, reduced glutathione, adiponectin, TLR4, E-selectin, myeloperoxidase, IL-6, hsCRP, sRAGE urine: 8-isoprostanes, creatinine, CML, stool: short chain fatty acid profile, CML, quantification of specific bacterial species

**Baseline data collection**

N = 15  
(prebiotic)

N = 15  
(control)

**Intervention:  
12 weeks**

Repeat data collection

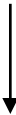

**Washout:  
2 weeks**

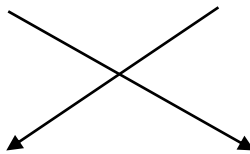

**Crossover to  
alternate treatment**

N = 15  
(prebiotic)

N = 15  
(control)

**Intervention:  
12 weeks**

Repeat data collection

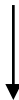

Data analysis

**Analysis**

(Intention-to-treat)
